# Supplementary material for: Identifying Natural Sonic Hedgehog Signalling Pathway Modulators with Potential Antifibrotic Activity in Chronic Kidney Disease: An in silico approach
Source: Research Square preprint supplement (doi:10.21203/rs.3.rs-7411385/v1), 2025-09-19
Supplement: Supplementary file 1 [file 008d745fbe7a32d514eb3755.docx]

**Catalytic Site Information of 3M1N:**

| Chain ID | Sequence ID | Amino acid | Atom |
| --- | --- | --- | --- |
| A | 68 | ARG | CG |
| A | 68 | ARG | NE |
| A | 68 | ARG | NH2 |
| A | 73 | PHE | O |
| A | 73 | PHE | CE2 |
| A | 73 | PHE | CZ |
| A | 74 | LYS | CA |
| A | 74 | LYS | O |
| A | 74 | LYS | CG |
| A | 76 | LEU | O |
| A | 76 | LEU | CB |
| A | 77 | THR | CA |
| A | 77 | THR | CB |
| A | 77 | THR | OG1 |
| A | 78 | PRO | O |
| A | 78 | PRO | CB |
| A | 78 | PRO | CG |
| A | 78 | PRO | CD |
| A | 80 | TYR | N |
| A | 80 | TYR | O |
| A | 80 | TYR | CB |
| A | 80 | TYR | CG |
| A | 80 | TYR | CD1 |
| A | 80 | TYR | CD2 |
| A | 80 | TYR | CE1 |
| A | 80 | TYR | CE2 |
| A | 80 | TYR | CZ |
| A | 80 | TYR | OH |
| A | 82 | PRO | CB |
| A | 82 | PRO | CG |
| A | 82 | PRO | CD |
| A | 86 | PHE | CB |
| A | 88 | ASP | CB |
| A | 88 | ASP | CG |
| A | 88 | ASP | OD2 |
| A | 91 | ASN | C |
| A | 91 | ASN | O |
| A | 91 | ASN | CG |
| A | 91 | ASN | OD1 |
| A | 91 | ASN | ND2 |
| A | 92 | THR | CA |
| A | 92 | THR | C |
| A | 92 | THR | O |
| A | 93 | GLY | N |
| A | 93 | GLY | CA |
| A | 93 | GLY | C |
| A | 93 | GLY | O |
| A | 95 | ASP | OD1 |
| A | 96 | ARG | CB |
| A | 96 | ARG | CD |
| A | 96 | ARG | NE |
| A | 97 | LEU | CG |
| A | 97 | LEU | CD1 |
| A | 97 | LEU | CD2 |
| A | 103 | LYS | NZ |
| B | 45 | LYS | O |
| B | 45 | LYS | CB |
| B | 45 | LYS | CG |
| B | 45 | LYS | CE |
| B | 45 | LYS | NZ |
| B | 47 | PHE | CD1 |
| B | 47 | PHE | CE1 |
| B | 47 | PHE | CE2 |
| B | 47 | PHE | CZ |
| B | 50 | ASN | O |
| B | 50 | ASN | OD1 |
| B | 50 | ASN | ND2 |
| B | 51 | VAL | CA |
| B | 51 | VAL | CB |
| B | 51 | VAL | CG1 |
| B | 52 | ALA | N |
| B | 52 | ALA | CA |
| B | 52 | ALA | CB |
| B | 53 | GLU | N |
| B | 53 | GLU | CB |
| B | 53 | GLU | OE1 |
| B | 54 | LYS | CG |
| B | 54 | LYS | CD |
| B | 54 | LYS | CE |
| B | 54 | LYS | NZ |
| B | 55 | THR | CG2 |
| B | 62 | TYR | CB |
| B | 134 | HIS | CA |
| B | 134 | HIS | C |
| B | 134 | HIS | O |
| B | 134 | HIS | CB |
| B | 134 | HIS | ND1 |
| B | 134 | HIS | CE1 |
| B | 135 | SER | CB |
| B | 135 | SER | OG |
| B | 136 | GLU | CB |
| B | 136 | GLU | OE1 |
| B | 136 | GLU | OE2 |
| B | 137 | GLU | N |
| B | 137 | GLU | O |
| B | 137 | GLU | CB |
| B | 137 | GLU | CG |
| B | 137 | GLU | CD |
| B | 137 | GLU | OE2 |
| B | 138 | SER | CA |
| B | 138 | SER | CB |
| B | 138 | SER | OG |
| B | 139 | LEU | N |
| B | 139 | LEU | CB |
| B | 140 | HIS | CD2 |
| B | 140 | HIS | NE2 |
| B | 147 | ASP | OD1 |
| B | 147 | ASP | OD2 |
| B | 172 | TRP | CZ2 |
| B | 172 | TRP | CZ3 |
| B | 172 | TRP | CH2 |
| B | 174 | TYR | CD2 |
| B | 174 | TYR | CE1 |
| B | 174 | TYR | CE2 |
| B | 174 | TYR | CZ |
| B | 174 | TYR | OH |
| B | 176 | GLU | CG |
| B | 176 | GLU | CD |
| B | 176 | GLU | OE1 |
| B | 176 | GLU | OE2 |
| B | 182 | HIS | CB |
| B | 182 | HIS | CG |
| B | 182 | HIS | ND1 |
| B | 182 | HIS | CD2 |
| B | 182 | HIS | CE1 |
| B | 182 | HIS | NE2 |

**Catalytic site information of 2GLI**

| Chain ID | Sequence ID | Amino acid | Atom |
| --- | --- | --- | --- |
| A | 145 | SER | OG |
| A | 163 | ARG | CD |
| A | 163 | ARG | NE |
| A | 179 | LYS | NZ |
| A | 181 | TYR | CD2 |
| A | 181 | TYR | CE2 |
| A | 181 | TYR | CZ |
| A | 181 | TYR | OH |
| A | 183 | ARG | CB |
| A | 183 | ARG | CD |
| A | 183 | ARG | NE |
| A | 183 | ARG | CZ |
| A | 183 | ARG | NH1 |
| A | 183 | ARG | NH2 |
| A | 185 | GLU | C |
| A | 185 | GLU | CB |
| A | 185 | GLU | CG |
| A | 185 | GLU | CD |
| A | 185 | GLU | OE1 |
| A | 186 | ASN | CA |
| A | 186 | ASN | C |
| A | 186 | ASN | O |
| A | 186 | ASN | CB |
| A | 186 | ASN | CG |
| A | 186 | ASN | OD1 |
| A | 186 | ASN | ND2 |
| A | 189 | THR | C |
| A | 189 | THR | O |
| A | 189 | THR | CB |
| A | 189 | THR | OG1 |
| A | 189 | THR | CG2 |
| A | 190 | HIS | N |
| A | 190 | HIS | CA |
| A | 190 | HIS | CB |
| A | 190 | HIS | ND1 |
| A | 190 | HIS | CE1 |
| A | 192 | ARG | NH1 |
| A | 193 | SER | CB |
| A | 193 | SER | OG |
| A | 200 | TYR | CE1 |
| A | 200 | TYR | OH |
| A | 212 | SER | CB |
| A | 212 | SER | OG |
| A | 213 | ASN | CB |
| A | 213 | ASN | CG |
| A | 213 | ASN | OD1 |
| A | 213 | ASN | ND2 |
| A | 214 | ALA | N |
| A | 214 | ALA | CB |
| A | 215 | SER | N |
| A | 215 | SER | CB |
| A | 215 | SER | OG |
| A | 216 | ASP | CG |
| A | 216 | ASP | OD1 |
| A | 216 | ASP | OD2 |
| A | 219 | LYS | CD |
| A | 219 | LYS | CE |
| A | 219 | LYS | NZ |
| A | 223 | ARG | NE |
| A | 223 | ARG | NH2 |
| A | 244 | ASP | CB |
| A | 244 | ASP | OD1 |
| A | 245 | PRO | N |
| A | 245 | PRO | CB |
| A | 245 | PRO | CG |
| A | 245 | PRO | CD |
| A | 246 | SER | N |
| A | 246 | SER | CB |
| A | 246 | SER | OG |
| A | 249 | ARG | NH2 |

**Catalytic site information of 4O9R**

| A | 204 | LYS | O |
| --- | --- | --- | --- |
| A | 205 | SER | CA |
| A | 205 | SER | C |
| A | 205 | SER | O |
| A | 205 | SER | CB |
| A | 206 | TRP | O |
| A | 207 | TYR | CA |
| A | 207 | TYR | CD1 |
| A | 207 | TYR | CE1 |
| A | 207 | TYR | OH |
| A | 208 | GLU | N |
| A | 208 | GLU | CG |
| A | 208 | GLU | OE2 |
| A | 215 | ILE | N |
| A | 215 | ILE | CB |
| A | 215 | ILE | CG1 |
| A | 215 | ILE | CG2 |
| A | 217 | CYS | O |
| A | 219 | ASN | N |
| A | 219 | ASN | CA |
| A | 219 | ASN | CB |
| A | 219 | ASN | CG |
| A | 219 | ASN | OD1 |
| A | 219 | ASN | ND2 |
| A | 220 | PRO | CG |
| A | 220 | PRO | CD |
| A | 221 | LEU | CG |
| A | 221 | LEU | CD1 |
| A | 222 | PHE | CE1 |
| A | 222 | PHE | CE2 |
| A | 222 | PHE | CZ |
| A | 230 | MET | CG |
| A | 230 | MET | SD |
| A | 230 | MET | CE |
| A | 234 | ILE | CD1 |
| A | 241 | THR | CG2 |
| A | 270 | VAL | CG1 |
| A | 270 | VAL | CG2 |
| A | 273 | CYS | C |
| A | 273 | CYS | O |
| A | 273 | CYS | CB |
| A | 274 | PHE | N |
| A | 274 | PHE | CA |
| A | 274 | PHE | O |
| A | 274 | PHE | CG |
| A | 274 | PHE | CD1 |
| A | 274 | PHE | CD2 |
| A | 274 | PHE | CE1 |
| A | 274 | PHE | CE2 |
| A | 274 | PHE | CZ |
| A | 277 | GLY | CA |
| A | 277 | GLY | C |
| A | 278 | SER | N |
| A | 278 | SER | OG |
| A | 281 | TRP | CD1 |
| A | 281 | TRP | NE1 |
| A | 281 | TRP | CZ2 |
| A | 281 | TRP | CH2 |
| A | 294 | VAL | CG1 |
| A | 296 | ARG | CD |
| A | 296 | ARG | CZ |
| A | 296 | ARG | NH1 |
| A | 300 | THR | CB |
| A | 300 | THR | OG1 |
| A | 301 | MET | O |
| A | 301 | MET | SD |
| A | 301 | MET | CE |
| A | 303 | LEU | CB |
| A | 303 | LEU | CD1 |
| A | 303 | LEU | CD2 |
| A | 321 | VAL | O |
| A | 321 | VAL | CG1 |
| A | 324 | ALA | C |
| A | 324 | ALA | O |
| A | 324 | ALA | CB |
| A | 325 | LEU | N |
| A | 325 | LEU | CA |
| A | 325 | LEU | O |
| A | 325 | LEU | CB |
| A | 325 | LEU | CD1 |
| A | 325 | LEU | CD2 |
| A | 328 | GLY | CA |
| A | 328 | GLY | C |
| A | 328 | GLY | O |
| A | 329 | VAL | N |
| A | 329 | VAL | CA |
| A | 329 | VAL | CG1 |
| A | 332 | PHE | CA |
| A | 332 | PHE | CB |
| A | 332 | PHE | CD1 |
| A | 335 | LEU | CD1 |
| A | 384 | ASP | CA |
| A | 384 | ASP | CB |
| A | 384 | ASP | CG |
| A | 384 | ASP | OD1 |
| A | 384 | ASP | OD2 |
| A | 385 | SER | N |
| A | 386 | VAL | CG2 |
| A | 387 | SER | CA |
| A | 387 | SER | CB |
| A | 387 | SER | OG |
| A | 389 | ILE | CD1 |
| A | 391 | PHE | CG |
| A | 391 | PHE | CD1 |
| A | 391 | PHE | CD2 |
| A | 391 | PHE | CE1 |
| A | 391 | PHE | CE2 |
| A | 391 | PHE | CZ |
| A | 394 | TYR | CA |
| A | 394 | TYR | C |
| A | 394 | TYR | O |
| A | 394 | TYR | CB |
| A | 394 | TYR | CG |
| A | 394 | TYR | CD1 |
| A | 394 | TYR | CD2 |
| A | 394 | TYR | CE1 |
| A | 394 | TYR | CE2 |
| A | 394 | TYR | CZ |
| A | 394 | TYR | OH |
| A | 395 | LYS | N |
| A | 395 | LYS | CA |
| A | 395 | LYS | O |
| A | 395 | LYS | CB |
| A | 395 | LYS | CG |
| A | 395 | LYS | CD |
| A | 395 | LYS | CE |
| A | 395 | LYS | NZ |
| A | 400 | ARG | CZ |
| A | 400 | ARG | NH1 |
| A | 400 | ARG | NH2 |
| A | 408 | ILE | CG2 |
| A | 408 | ILE | CD1 |
| A | 459 | ALA | CB |
| A | 462 | PHE | O |
| A | 463 | VAL | CA |
| A | 463 | VAL | CG1 |
| A | 463 | VAL | CG2 |
| A | 466 | THR | CB |
| A | 466 | THR | OG1 |
| A | 466 | THR | CG2 |
| A | 470 | HIS | CE1 |
| A | 470 | HIS | NE2 |
| A | 473 | ASP | O |
| A | 473 | ASP | CG |
| A | 473 | ASP | OD2 |
| A | 477 | GLN | CG |
| A | 477 | GLN | CD |
| A | 477 | GLN | OE1 |
| A | 477 | GLN | NE2 |
| A | 480 | TRP | C |
| A | 480 | TRP | O |
| A | 480 | TRP | CB |
| A | 480 | TRP | CE3 |
| A | 480 | TRP | CZ3 |
| A | 481 | GLU | CA |
| A | 481 | GLU | O |
| A | 481 | GLU | CB |
| A | 481 | GLU | CG |
| A | 481 | GLU | CD |
| A | 481 | GLU | OE1 |
| A | 481 | GLU | OE2 |
| A | 484 | PHE | CB |
| A | 484 | PHE | CG |
| A | 484 | PHE | CD1 |
| A | 484 | PHE | CD2 |
| A | 484 | PHE | CE1 |
| A | 484 | PHE | CE2 |
| A | 484 | PHE | CZ |
| A | 485 | ARG | CB |
| A | 513 | PRO | O |
| A | 513 | PRO | CB |
| A | 513 | PRO | CG |
| A | 515 | LEU | CA |
| A | 515 | LEU | CD2 |
| A | 518 | GLU | CA |
| A | 518 | GLU | CB |
| A | 518 | GLU | CG |
| A | 518 | GLU | CD |
| A | 518 | GLU | OE1 |
| A | 518 | GLU | OE2 |
| A | 521 | ASN | CB |
| A | 521 | ASN | CG |
| A | 521 | ASN | OD1 |
| A | 521 | ASN | ND2 |
| A | 522 | LEU | CG |
| A | 522 | LEU | CD1 |
| A | 522 | LEU | CD2 |
| A | 525 | MET | CA |
| A | 525 | MET | O |
| A | 525 | MET | CB |
| A | 525 | MET | CG |
| A | 525 | MET | SD |
| A | 525 | MET | CE |
| A | 526 | PHE | CD1 |
| A | 526 | PHE | CE1 |
| A | 528 | THR | CB |
| A | 528 | THR | OG1 |
| A | 528 | THR | CG2 |
| A | 532 | MET | CG |
| A | 532 | MET | SD |

**Grid Box Information for 3M1N**

spacing 0.375

npts 80 52 54

center 8.155 1.471 24.019

**Grid Box Information for 2GLI**

spacing 0.375

npts 48 76 70

center -26.035 1.831 1.768

**Grid Box Information for 4O9R**

**4o9r**

**spacing 0.375**

**npts 98 64 64**

**center 40.348 1.906 51.795**
